# Supplementary material
Source: PubMed Central journal article supplement (PMC1459687)
Supplement: eukcell_5_5_794__1.pdf [file eukcell_5_5_794__1.pdf]

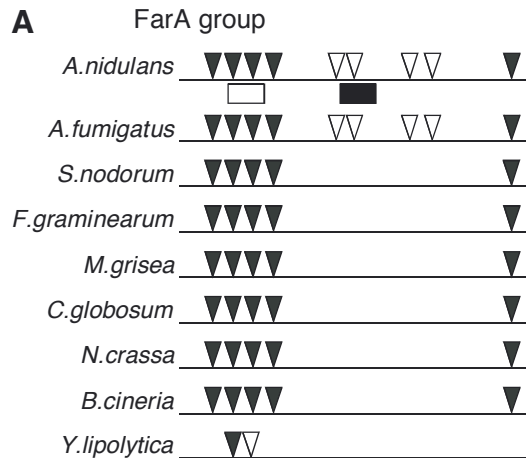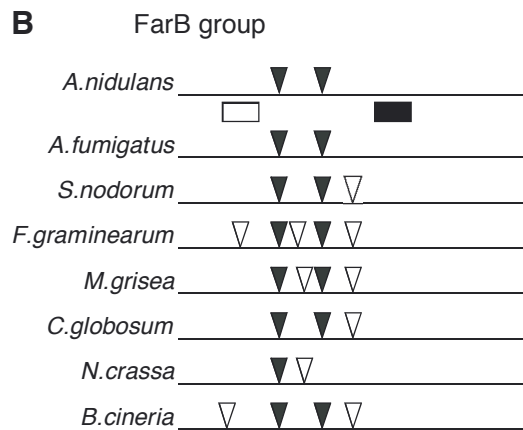

**Supplementary Figure S 4.** Intron positions predicted in *farA* and *farB* genes. Conserved introns are indicated as black and non-conserved as white triangles. The sequence encoding the Zn(2)-Cys(6) DNA binding domain is represented by a white box and the fungal specific transcription domain as a black box. (A) *farA* genes contain five highly conserved introns. *Y.lipolytica* contains one of the conserved introns and one extra non-conserved intron. Both *C.albicans* and *D.hansenii* do not contain any introns. (B) All *farB* genes contain two conserved introns except the *N. crassa* gene. Both *B. cineria* and *F. graminearum* genes have introns in the Cys6 finger coding region.
